# Supplementary material for: A Postbiotic Consisting of Heat-Treated Lactobacilli Has a Bifidogenic Effect in Pure Culture and in Human Fermented Fecal Communities
Source: PubMed Central journal article supplement (PMC8091120; doi:10.1128/aem.02459-20), 2021-03-26
Supplement: AEM.02459-20-s0001.pdf [file AEM.02459-20-s0001.pdf]

# 1 SUPPLEMENTARY FIGURES

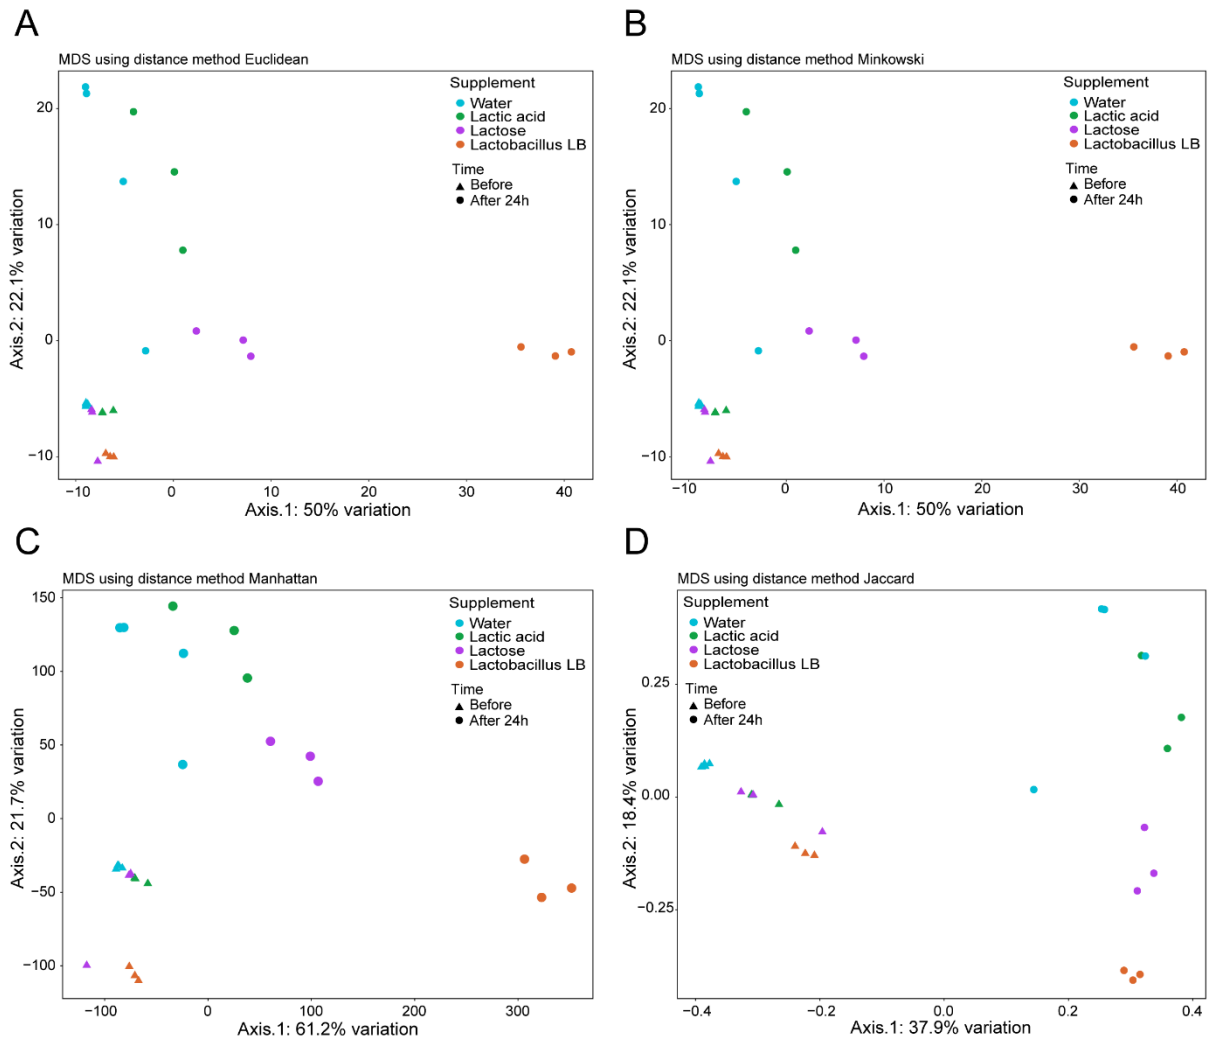

2

3 Figure S1. PCoA plot representing metabolic profiles based on the (A) Euclidian, (B)  
4 Minkowski, (C) Manhattan and (D) Jaccard distances of samples at the start (triangle) and after  
5 (circle) 24-hour faecal fermentation in vessels supplemented with water (blue), lactic acid  
6 (green), lactose (purple) or Lactobacillus LB (orange). Graph prepared based on the non-  
7 normalised relative concentrations of the variables in reduced datasets for SCFA and other  
8 metabolites (6 + 178 compounds).

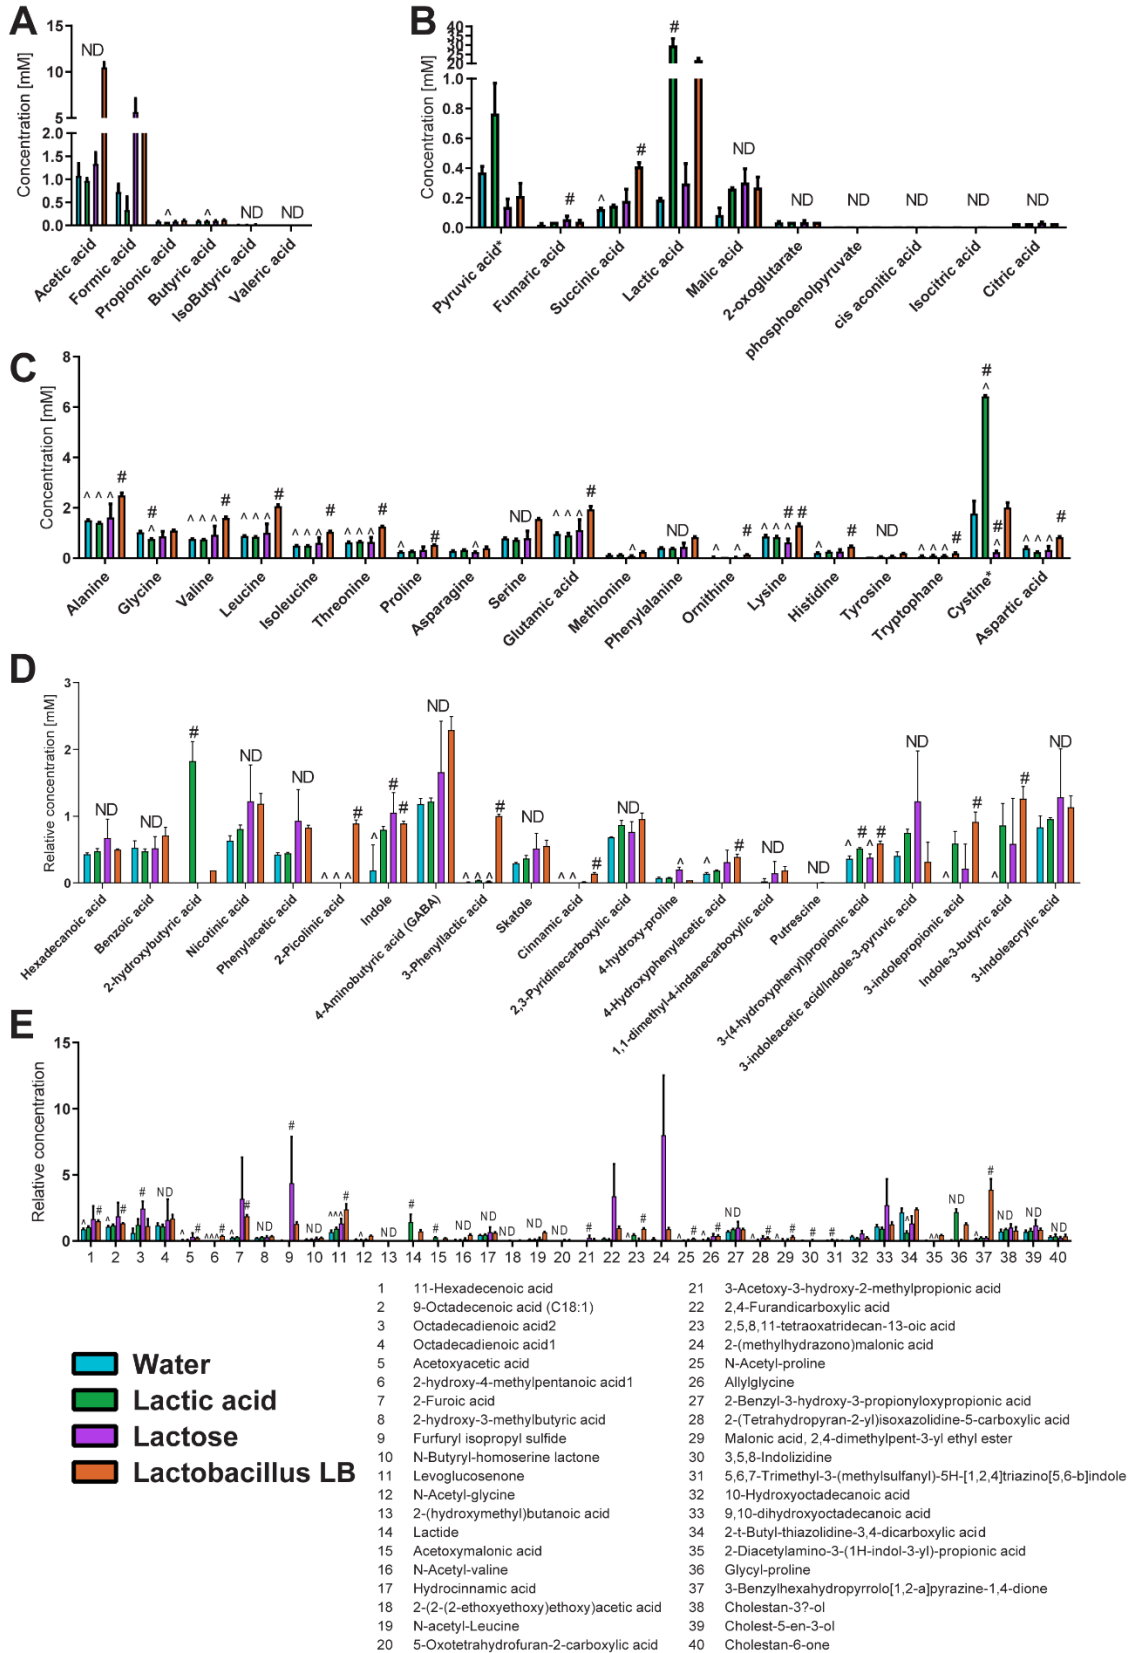

9

10 **Figure S2.** Annotated metabolite levels before the 24-hour faecal fermentation. Vessels were  
 11 supplemented with water (blue), lactic acid (green), lactose (purple), or Lactobacillus LB  
 12 (orange).

13 (A) SCFA. Before the start of the fermentation, there were low levels of individual SCFAs,  
14 and we observed no differences between the vessels in levels of acetic acid (Kruskal-Wallis  
15 test  $p=0.037$ ; post-hoc Bonferroni  $p>0.05$ ), isobutyric acid (Kruskal-Wallis test  $p=0.023$ ; post-  
16 hoc Bonferroni  $p>0.05$ ), and valeric acid (Kruskal-Wallis test  $p=1.000$ ). In the Lactobacillus  
17 LB vessels, we detected slightly higher levels of butyric acid (Kruskal-Wallis test  $p=0.030$ ;  
18 post-hoc Bonferroni  $p=0.050$ ) and propionic acid (Kruskal-Wallis test  $p=0.026$ ; post-hoc  
19 Bonferroni  $p=0.016$ ) compared to lactic acid vessels at the start of the fermentation, but no  
20 difference compared to water or lactose vessels (Kruskal-Wallis test  $p<0.05$ ; post-hoc  
21 Bonferroni  $p>0.05$ ). Before fermentation, levels of formic acid differed only between lactic  
22 acid and lactose vessels (Kruskal-Wallis test  $p=0.012$ ; post-hoc Bonferroni  $p=0.013$ ). Levels  
23 of isovaleric acid, hexanoic acid, heptanoic acid, and valeric acid in all samples before  
24 fermentation were below the limit of detection (LOD).

25 (B) Citric acid cycle compounds. Before fermentation, elevated levels of succinic acid were  
26 detected in the Lactobacillus LB vessels (Kruskal-Wallis test  $p=0.018$ , post-hoc Bonferroni  
27  $p=0.010$ ) and elevated fumaric acid was also detected in lactose vessels ( $F(3,9)=5.599$ ,  
28  $p=0.019$ ; post-hoc Bonferroni  $p=0.017$ ), both compared to water. As expected before  
29 fermentation, levels of lactic acid were higher in lactic acid vessels (Kruskal-Wallis test  
30  $p=0.010$ , post-hoc Bonferroni  $p=0.008$ ) compared to water. At this time, lactic acid levels were  
31 higher in Lactobacillus LB vessels compared to water, but did not pass the multiple comparison  
32 criteria (Kruskal-Wallis test  $p=0.010$ , pairwise comparison post-hoc Bonferroni  $p=0.028$ ,  
33 multiple comparisons adjusted post-hoc Bonferroni  $p=0.171$ ). Before fermentation, a higher  
34 pyruvate level was detected in lactic acid compared to lactose vessels (Kruskal-Wallis test  
35  $p=0.013$ , post-hoc Bonferroni  $p=0.019$ ). There were no differences in the levels of the  
36 remaining six TCA cycle compounds between the vessels (Kruskal-Wallis test  $p>0.05$ ).

37 (C) Amino acid levels. Before fermentation, 12 of 19 tested amino acids were found to be  
38 present at levels that were elevated in the Lactobacillus LB vessels, in comparison to water  
39 vessels. In particular, before fermentation tryptophan levels were higher in Lactobacillus LB  
40 vessels compared to all other vessels ( $F(3,9)=17.431$ ,  $p<0.0005$ ; post-hoc Bonferroni  $p\leq 0.006$ ).

41 (D) Other identified compounds. Before fermentation, among the remaining 21 identified, only  
42 8 of these were found to be present at elevated levels in the Lactobacillus LB vessels compared  
43 to water vessels.

44 (E) Annotated compounds. Before fermentation, 12 out of 40 annotated compounds were found  
45 to be present at elevated levels in the Lactobacillus LB vessels compared to water vessels.

46 The experiment was performed in triplicate or quadruplicate. # indicates significant change  
47 compared to the water vessel. ^ indicates significant change compared to Lactobacillus LB  
48 vessel. ND indicates no statistical difference between any of the vessels. \* indicates relative  
49 measurement.

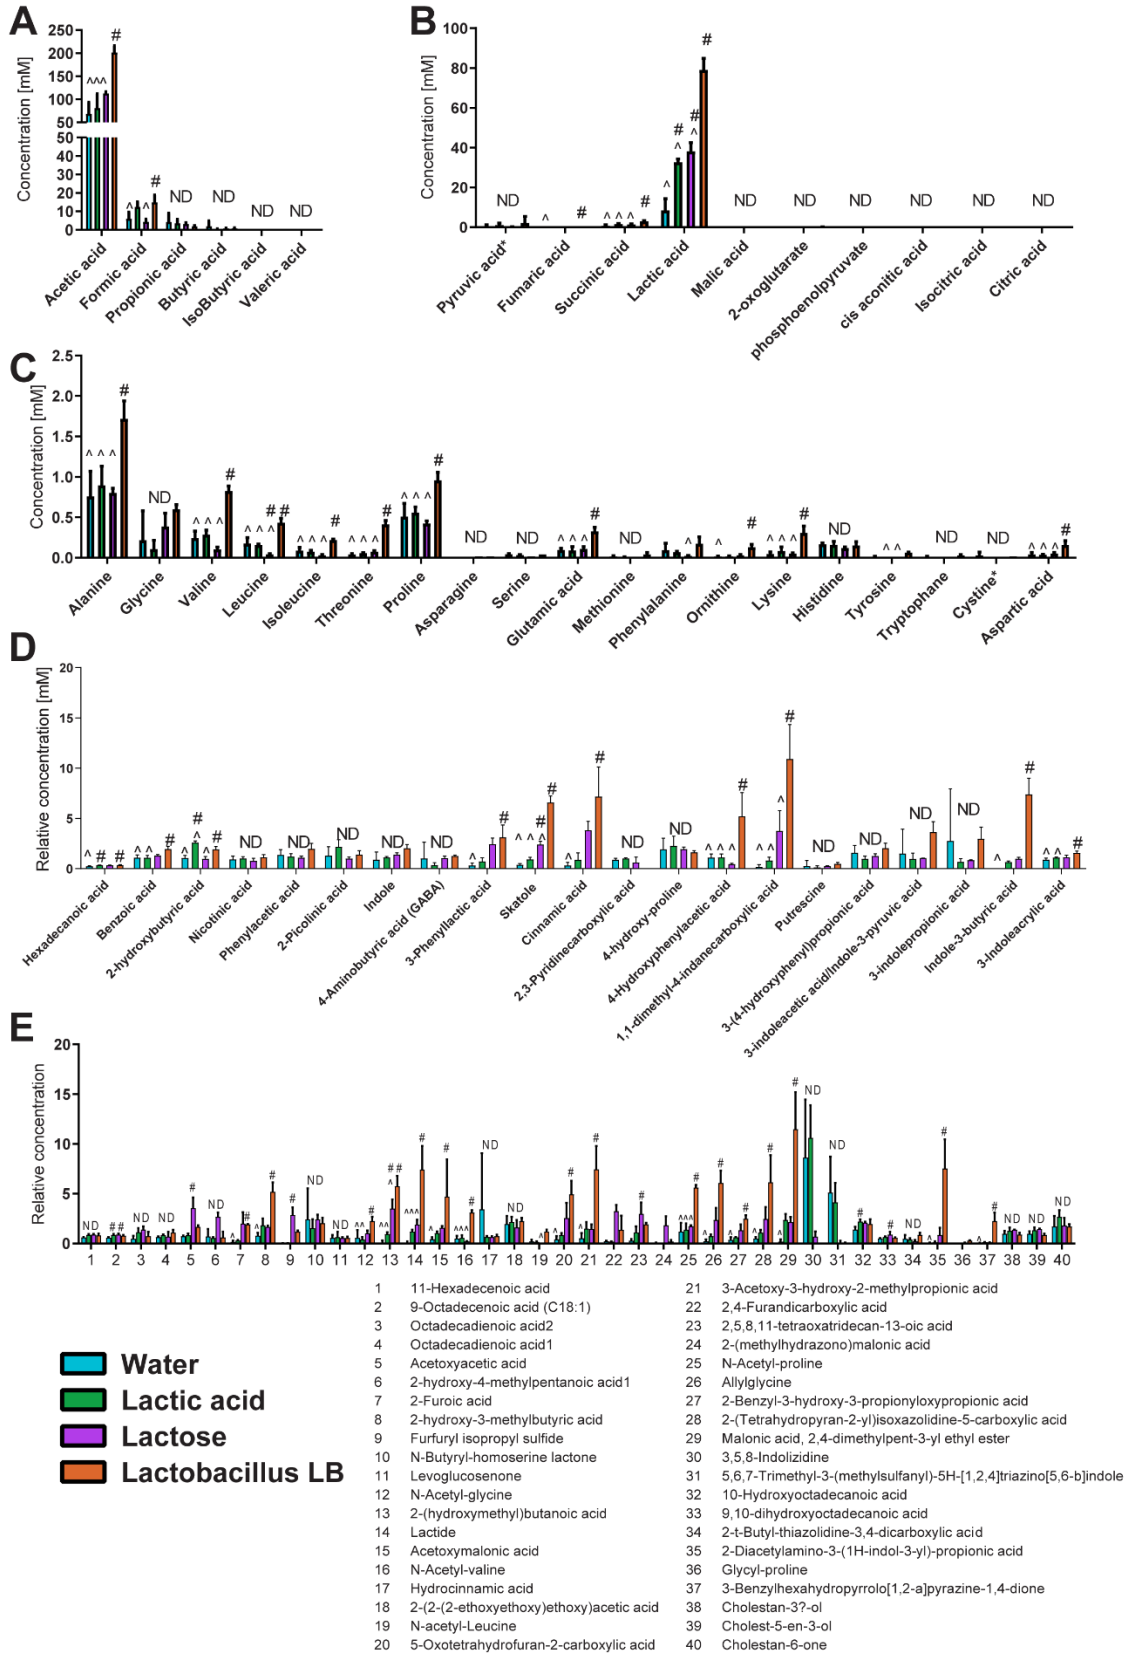

50

51 **Figure S3.** Annotated metabolite levels after the 24-hour faecal fermentation. Vessels were  
 52 supplemented with water (blue), lactic acid (green), lactose (purple), or Lactobacillus LB  
 53 (orange).

54 (A) SCFA. After 24 h fermentation, we observed elevated levels of acetic acid in Lactobacillus  
55 LB vessels compared to all other vessels (Fig. S3A;  $F(3,9)=24.246$ ,  $p<0.0005$ ; post-hoc  
56 Bonferroni  $p\leq 0.004$ ). Additionally, after 24 h fermentation formic acid levels were  
57 significantly higher in Lactobacillus LB vessels compared to water and lactose vessels  
58 ( $F(3,9)=8.155$ ,  $p=0.006$ ; post-hoc Bonferroni  $p=0.029$  and  $p=0.015$ , respectively). After  
59 fermentation, there were no significant differences between vessels in propionic acid  
60 ( $F(3,9)=0.382$ ,  $p=0.769$ ), butyric acid (Kruskal-Wallis test  $p=0.401$ ), isobutyric acid (Kruskal-  
61 Wallis test  $p=0.094$ ), and valeric acid (Kruskal-Wallis test  $p=0.205$ ) levels. Levels of isovaleric  
62 acid, hexanoic acid and heptanoic acid in all samples were below the limit of detection (LOD).

63 (B) Citric acid cycle compounds. After the 24h fermentation, levels of fumaric acid (Kruskal-  
64 Wallis test  $p=0.025$ , post-hoc Bonferroni  $p=0.035$ ), succinic acid ( $F(3,9)=22.239$ ,  $p<0.0005$ ;  
65 post-hoc Bonferroni  $p<0.0005$ ), and lactic acid ( $F(3,9)=120.294$ ,  $p<0.0005$ ; post-hoc  
66 Bonferroni  $p<0.0005$ ) were elevated in Lactobacillus LB vessels compared to water. After  
67 fermentation, levels of lactic acid were also elevated in lactic acid ( $F(3,9)=120.294$ ,  $p<0.0005$ ;  
68 post-hoc Bonferroni  $p=0.001$ ) and lactose ( $F(3,9)=120.294$ ,  $p<0.0005$ ; post-hoc Bonferroni  
69  $p<0.0005$ ) vessels compared to water but not to the levels found in Lactobacillus LB vessels  
70 (post-hoc Bonferroni  $p<0.0005$  for both). There were no differences in the levels of the  
71 remaining six TCA cycle compounds between the vessels (Kruskal-Wallis test  $p>0.05$ ).

72 (C) Amino acid levels. After fermentation, ten of 19 tested amino acids were found to be  
73 present at higher levels in the Lactobacillus LB vessels, in comparison to water vessels.

74 (D) Other identified compounds. After fermentation, among the remaining 21 identified, 10 of  
75 these were found to be present at elevated levels in the Lactobacillus LB vessels compared to  
76 water vessels.

77 (E) Annotated compounds. After fermentation, 16 out of 40 annotated compounds were found  
78 to be present at elevated levels in the Lactobacillus LB vessels compared to water vessels.

79 The experiment was performed in triplicate or quadruplicate. # indicates significant change  
80 compared to the water vessel. ^ indicates significant change compared to Lactobacillus LB  
81 vessel. ND indicates no statistical difference between any of the vessels. \* indicates relative  
82 measurement.

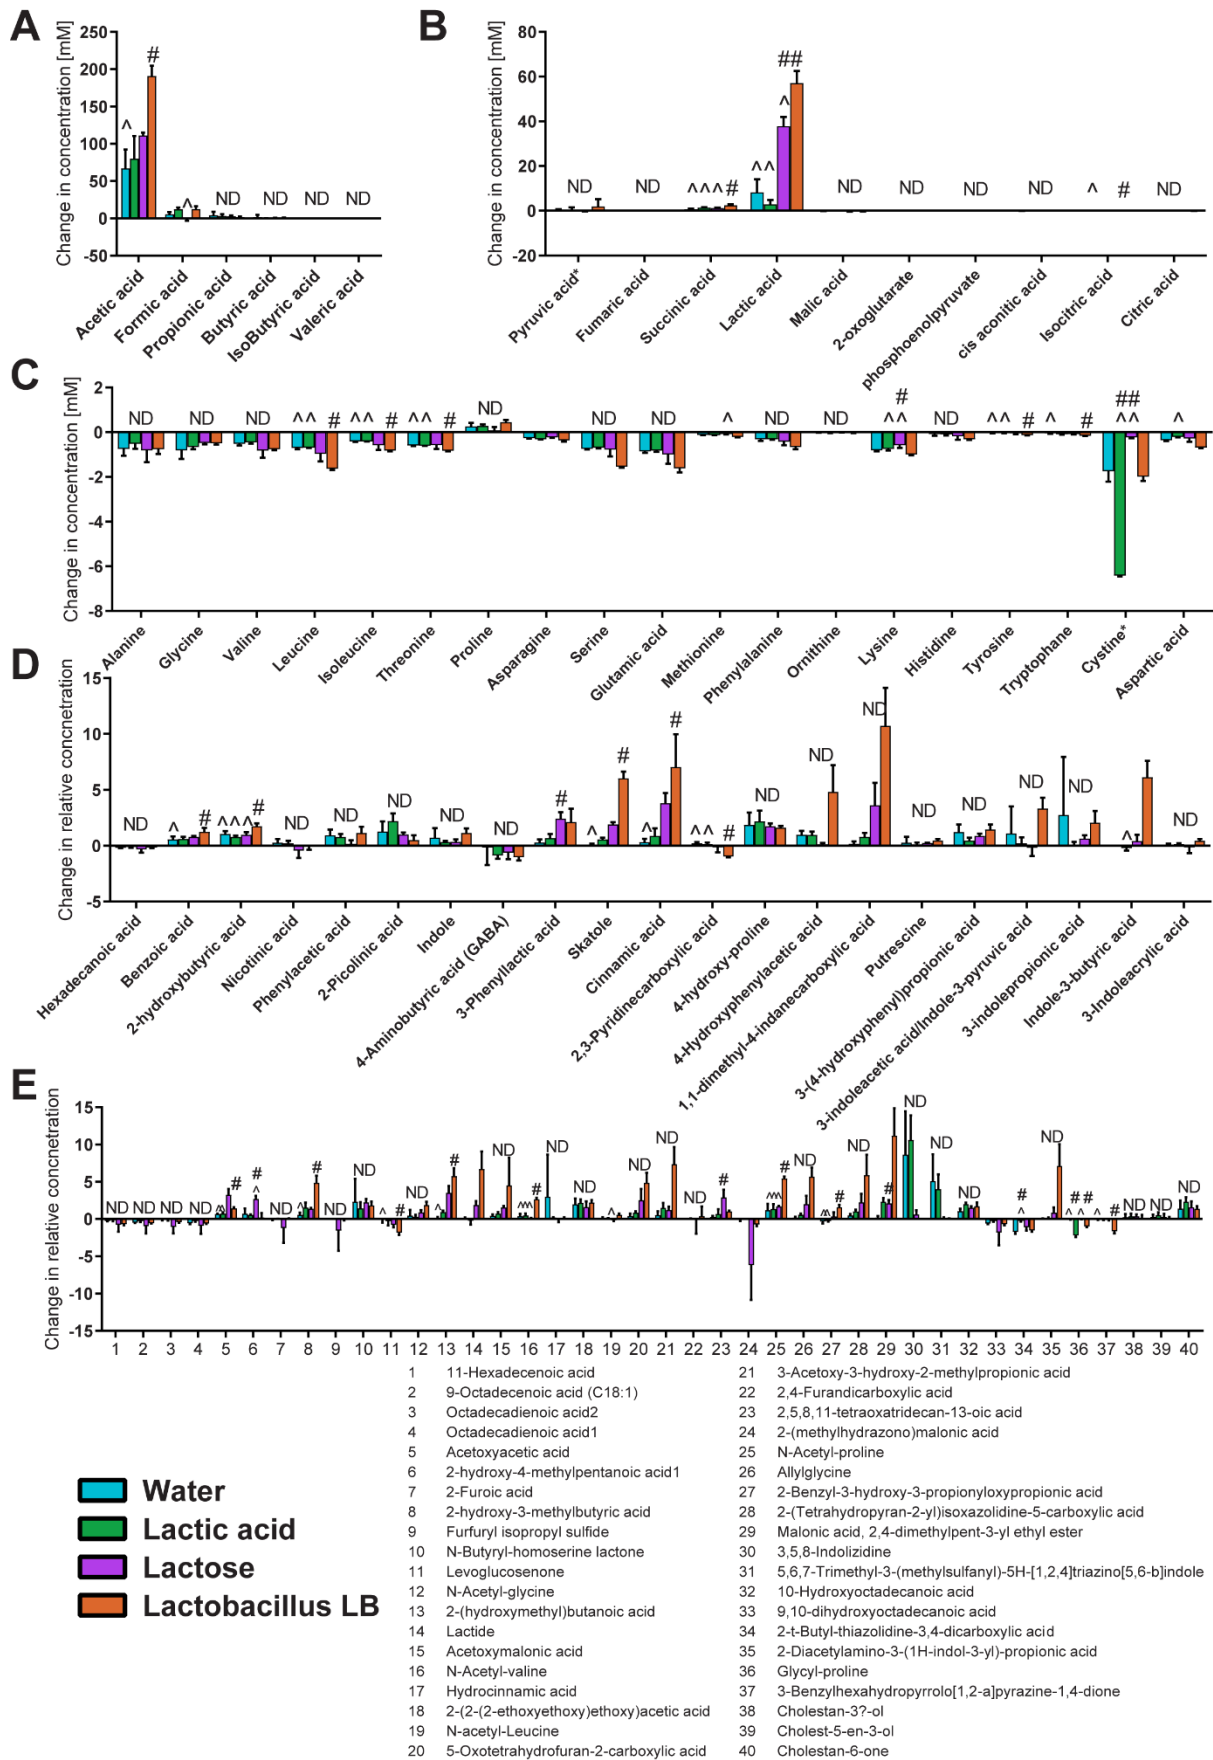

83

84 Figure S4. Change in annotated metabolite levels during the 24-hour faecal fermentation.

85 Vessels were supplemented with water (blue), lactic acid (green), lactose (purple), or

86 Lactobacillus LB (orange). The experiment was performed in triplicate or quadruplicate. #  
87 indicates significant change compared to the water vessel. ^ indicates significant change  
88 compared to Lactobacillus LB vessel. ND indicates no statistical difference between any of the  
89 vessels. \* indicates relative measurement.

90
